# Supplementary material
Source: publisher figshare collection journal article supplement (https://karger.figshare.com/ndownloader/files/22744196)
Supplement: Supplementary file 1 [file 22744196]

**Supplementary Table 1:** Additional baseline characteristics (including additional variables included in calculating IPTW weights) of the study population

|  | **All** | **No opioid use** | **Opioid use** | **Missing** | **Standardized differences** | |
| --- | --- | --- | --- | --- | --- | --- |
|  | **(N=1,229)** | **(N=258)** | **(N=971)** | **N (%)** | **Before IPTW** | **After IPTW** |
| **Demographics*** |  |  |  |  |  |  |
| Marital Status, n (%) |  |  |  | 7 (0.6) | 0.306 | 0.114 |
| Married | 811 (66) | 198 (77) | 613 (63) |  |  |  |
| Single | 97 (8) | 18 (7) | 79 (8) |  |  |  |
| Divorced | 271 (22) | 36 (14) | 235 (24) |  |  |  |
| Widowed | 43 (3.5) | 6 (2) | 37 (4) |  |  |  |
| Service Connected Disability, n (%) | 770 (63) | 146 (57) | 624 (64) | 1 (0.08) | 0.159 | 0.140 |
| Median per capita income (IQR), $USD | 24,273 (10,140-37,512) | 32,598 (11,046-69,748) | 22,345 (10,000-  35,676) | 10 (0.8) | -0.385 | -0.029 |
| **Comorbidities,* n (%)** |  |  |  | 18 (1.5) |  |  |
| Myocardial Infarction | 142 (12) | 27 (10.5) | 115 (12) |  | 0.030 | -0.147 |
| Congestive Heart Failure | 285 (23) | 50 (19) | 235 (24) |  | 0.097 | -0.115 |
| Peripheral Vascular Disease | 353 (29) | 76 (29.5) | 277 (29) |  | -0.048 | -0.156 |
| Cerebrovascular Disease | 194 (16) | 33 (13) | 161 (17) |  | 0.092 | -0.133 |
| Dementia | 197 (16) | 46 (18) | 151 (16) |  | -0.081 | -0.171 |
| Connective Tissue Disease | 121 (10) | 26 (10) | 95 (10) |  | -0.024 | -0.153 |
| Peptic Ulcer Disease | 79 (6) | 21 (8) | 58 (6) |  | -0.097 | -0.062 |
| AIDS/HIV | 23 (2) | 2 (0.8) | 21 (2) |  | 0.113 | 0.027 |
| Anemia | 678 (55) | 128 (50) | 550 (57) |  | 0.100 | -0.093 |
| Hyperlipidemia | 581 (47) | 118 (46) | 463 (48) |  | 0.000 | -0.135 |
| Ischemic Heart Disease | 344 (28) | 67 (26) | 277 (29) |  | 0.033 | -0.135 |
| **Preemptive transplantation, n (%)** | 219 (18) | 70 (27) | 149 (15) | 18 (1.5) | -0.318 | -0.068 |
| **Vital Signs,** Mean (SD)** |  |  |  |  |  |  |
| SBP, mmHg | 137 (17) | 135 (20) | 138 (17) | 114 (9) | 0.169 | 0.140 |
| DBP, mmHg | 75 (10) | 74 (12) | 76 (10) | 114 (9) | 0.111 | 0.208 |
| BMI, kg/m2 | 29 (5) | 28 (5) | 29 (5) | 156 (13) | 0.070 | 0.032 |
| **Medication use,** n (%)** |  |  |  | 18 (1.5) |  |  |
| ESAs | 192 (16) | 17 (7) | 175 (18) |  | 0.344 | 0.334 |
| Native vitamin D | 260 (21) | 31 (12) | 229 (24) |  | 0.292 | 0.239 |
| Active vitamin D | 326 (27) | 49 (19) | 277 (29) |  | 0.206 | 0.222 |
| Sevelamer | 487 (40) | 55 (21) | 432 (44) |  | 0.489 | 0.377 |
| Lanthanum | 136 (11) | 11 (4) | 125 (13) |  | 0.304 | 0.299 |
| Calcium Acetate | 395 (32) | 52 (20) | 343 (35) |  | 0.324 | 0.077 |
| Anticoagulants | 254 (21) | 5 (2) | 249 (26) |  | 0.530 | 0.665 |
| Thrombolytics | 16 (1) | 0 (0) | 16 (2) |  | 0.184 | 0.176 |
| Aspirin | 316 (26) | 24 (9) | 292 (30) |  | 0.53 | 0.417 |
| Digitalis | 11 (0.9) | 1 (0.4) | 10 (1) |  | 0.075 | 0.077 |
| β‐blockers | 781 (64) | 102 (40) | 679 (70) |  | 0.608 | 0.432 |
| Alpha Blockers | 242 (20) | 33 (13) | 209 (22) |  | 0.218 | 0.217 |
| Calcium channel Blockers | 687 (56) | 106 (41) | 581 (60) |  | 0.348 | 0.231 |
| Antianginals | 113 (9) | 11 (4) | 102 (11) |  | 0.233 | 0.147 |
| Statins | 694 (56) | 107 (41) | 587 (60) |  | 0.352 | 0.181 |
| Vasodilators | 296 (24) | 29 (11) | 267 (27) |  | 0.407 | 0.306 |
| Thiazides | 71 (6) | 11 (4) | 60 (6) |  | 0.078 | 0.034 |
| Loop Diuretics | 502 (41) | 62 (24) | 440 (45) |  | 0.437 | 0.325 |
| Potassium Sparing Diuretics | 43 (4) | 6 (2) | 37 (4) |  | 0.08 | 0.325 |
| RAAS inhibitors | 542 (44) | 86 (33) | 456 (47) |  | 0.252 | 0.072 |
| Radio contrast media | 12 (0.9) | 0 (0) | 12 (1) |  | 0.159 | 0.174 |
| Insulin | 515 (42) | 49 (19) | 466 (48) |  | 0.627 | 0.148 |
| **Labs,* Mean (SD)** |  |  |  |  |  |  |
| Albumin | 4 (0.6) | 4 (0.6) |  | 332 (27) | 0.056 | 0.079 |
| AST | 24(17) | 22 (13) |  | 330 (27) | 0.102 | 0.072 |
| ALT | 24 (16) | 24 (13) |  | 320 (26) | 0.036 | 0.018 |
| Hemoglobin | 11 (1) | 12 (2) |  | 348 (28) | -0.29 | -0.251 |
| Phosphorus | 5 (1) | 5 (1) |  | 548 (45) | 0.157 | -0.003 |
| PTH | 328 (246) | 216 (168) |  | 842 (69) | 0.578 | 0.540 |

* These variables were included in the calculation of IPTW

**These variables were not included in the calculation of IPTW.

AIDS, Acquired Immunodeficiency Syndrome; ALT, alanine aminotransferase; AST, aspartate aminotransferase; BMI, body mass index; DBP, diastolic blood pressure; ESAs, erythropoietin‐stimulating agents; HIV, Human Immunodeficiency Virus; IPTW, inverse probability of treatment weighting; IQR, interquartile range; PTH, parathyroid hormone; RAAS, renin-angiotensin-aldosterone system; RRT, renal replacement therapy; SBP, systolic blood pressure; SD, standard deviation; USD, United States dollar.
